# Supplementary material for: Aromatic annulation strategy for naphthalenes fused at 1,2- and 3,4-positions with two heterocycles
Source: Royal Society of Chemistry journal article supplement (doi:10.1039/b514496e), 2005-11-18
Supplement: b514496e.pdf [file b514496e.pdf]

# Aromatic Annulation Strategy for Naphthalenes Fused at 1,2- and 3,4-Positions with Two Heterocycles

Min Zhang, Hui-Ying An, Bao-Guo Zhao, and Jian-Hua Xu\*  
Department of Chemistry, Nanjing University, Nanjing 210093, CHINA  
E-mail: [xujh@nju.edu.cn](mailto:xujh@nju.edu.cn) Fax: 86-25-83317761

## Supplementary Data

### General experimental procedures

Melting points are uncorrected. <sup>1</sup>H-NMR were recorded on a Bruker DPX 300 at 300MHz with CDCl<sub>3</sub> as solvent. Chemical shifts are reported in δ (ppm). *J* values are given in Hz. Infrared spectra were taken with a Shimadzu IR 440 spectrometer in KBr pellets. Mass spectra were recorded with a VG ZAB-HS spectrometer. Elemental analyses were done on a Perkin-Elmer-240C analyzer. UV spectra were recorded with a Shimadzu UV-2401PC UV-VIS recording spectrophotometer. Fluorescence spectra were done on a SLM Aminco Bowman Series 2 Luminescence Spectrometer. Benzene (A R grade) was dried with sodium and distilled before use.

### Preparative photolysis for *N*-methyl-3, 4-dichloromaleimide (1) and 3, 4-dichlorocoumarin (2)

The light source was a medium-pressure mercury lamp (500W) in a glass cooling water jacket. The solution of *N*-methyl-3, 4-dichloromaleimide (**1**) or 3, 4-dichlorocoumarin (**2**) (0.05M) and an excess amount of phenylbenzofuran and phenylbenzothiophene (**3a-3d**) in benzene was purged with dry nitrogen for 30 min and then irradiated with light of λ > 300nm under continuous nitrogen purging. The reaction course was monitored by TLC. After the photolysis, the solvent was removed *in vacuo* and the residue was separated by flash chromatography on a silica gel column with petroleum ether (b. p. 60-90°C)-ethyl acetate as eluents.

**Photolysis of 1 with 2-phenylbenzofuran (3a):** A solution of **1** (540 mg, 3.0 mmol) and **3a** (756 mg, 3.9 mmol) in benzene (60 ml) was photolyzed for 21h to reach a complete conversion of **1**. Work-up as described above gave **4a** (73.4%) and **5a** (24.2%).

Heating **4a** (200mg) on silica gel (2g) at 100°C for 12h, a 98% conversion of **4a** was reached. Separation of the reaction mixture by flash chromatography on a silica gel gave **5a** (1.2%) and **6a** (93.9%). Irradiating a solution of **6a** (50mg) in acetone (20ml) with light of λ > 400nm under continuous nitrogen purging for 10h resulted in a complete conversion of **6a** and gave **5a** (96.1%).

If the mixture of **5a** and **6a** obtained by heating **4a** on silica was not separated but was dissolved in acetone and irradiated with light of λ > 400nm under continuous nitrogen purging for 10h to reach a complete conversion of **4a**, this gave **5a** (92.2%). The total yield of **5a** in photoreaction and in subsequent conversion of **4a** was 94.2%

#### **4a**

MP 160-161°C

<sup>1</sup>H-NMR (300 MHz; CDCl<sub>3</sub>) δ 2.83(3H, s, NCH<sub>3</sub>), 4.97(1H, s), 7.05(1H, d, *J* = 8.2), 7.11(1H, dd, *J*<sub>1</sub>=7.5, *J*<sub>2</sub>=0.8), 7.35(1H, d, *J*=7.9), 7.38-7.46(6H, m)

IR (KBr) ν 3066, 2963, 1795, 1726, 1594, 1479, 1457, 1427, 1370, 1279, 1237, 1007, 971, 779, 742, 699cm<sup>-1</sup>

MS *m/z* (%) 337(M<sup>+</sup>-HCl, 35.31), 302(M<sup>+</sup>-2Cl, 9.08), 245(33.84), 217(20.82), 194(Base), 189(27.67), 165(16.12), 151(4.06), 44(5.41)

EA Found: C, 60.81; H, 3.34; N, 3.56. C<sub>19</sub>H<sub>13</sub>Cl<sub>2</sub>N<sub>1</sub>O<sub>3</sub> requires C, 60.98; H, 3.50; N 3.74.

#### **5a**

MP 244-245°C

<sup>1</sup>H-NMR (300 MHz; CDCl<sub>3</sub>) δ 3.31(3H, s, NCH<sub>3</sub>), 7.53(1H, t, *J*=7.5), 7.62(1H, td, *J*<sub>1</sub>=7.8, *J*<sub>2</sub>=1.2), 7.73-8.82(3H, m), 8.51(1H, m), 8.80(1H, d, *J*=8.1), 9.09(1H, m)

IR (KBr)  $\nu$  3071, 2924, 1756, 1699, 1600, 1572, 1458, 1373, 1350, 1286, 1191, 1102, 990, 753 $\text{cm}^{-1}$   
MS  $m/z$  (%) 301(M, base), 257(13.09), 216(37.48), 187(16.16), 151(4.16), 108(5.13)  
EA Found: C, 75.84; H, 3.41; N, 4.68.  $\text{C}_{19}\text{H}_{11}\text{N}_1\text{O}_3$  requires C, 75.74; H, 3.68; N, 4.65.  
UV (nm) (log  $\epsilon$ ): 397(3.85), 292(4.50)

#### **6a**

MP 164-165 $^{\circ}\text{C}$

$^1\text{H-NMR}$  (300 MHz;  $\text{CDCl}_3$ )  $\delta$  3.20(3H, s,  $\text{NCH}_3$ ), 7.32(1H, d,  $J=7.3$ ), 7.39(1H, d,  $J=7.7$ ), 7.44-7.48(3H, m), 7.53(1H, d,  $J=7.7$ ), 7.61(1H, d,  $J=7.8$ ), 7.68-7.70(2H, m)

IR (KBr)  $\nu$  1781, 1720, 1650, 1442, 1386, 1224, 1141, 988, 830, 775, 688 $\text{cm}^{-1}$

MS  $m/z$  (%) 339( $\text{M}^++2$ , 26.46), 337( $\text{M}^+$ , 77.23), 302( $\text{M}^+-\text{Cl}$ , 14.71), 301( $\text{M}^+-\text{HCl}$ , 11.26), 245(Base), 217(53.64), 189(47.52), 163 (7.62), 95(14.87), 77(7.55)

EA Found: C, 67.57; H, 3.41; N, 4.08.  $\text{C}_{19}\text{H}_{12}\text{N}_1\text{O}_3\text{Cl}$  requires C, 67.66; H, 3.56; N, 4.15.

**Photolysis of 1 with 3-phenylbenzofuran (3b):** A solution of **1** (540 mg, 3 mmol) and **3b** (756 g, 3.9 mmol) in benzene (60 ml) was photolyzed for 48h to reach a 63.3% conversion of **1**. Work-up as described above gave **4b** (86.8%) and **5b** (5.84%).

Heating **4b** (200mg) on silica gel (2g) at 90 $^{\circ}\text{C}$  for 12h, a complete conversion was reached and this gave the only product **6b** (95.9%). Irradiating a solution of **6b** (100mg) in acetone (20ml) for 18h with light of  $\lambda > 400\text{nm}$  under continuous nitrogen purging resulted in a complete conversion of **6b** and gave **5b** (98.9%).

If **6b** obtained by heating **4b** on silica was not separated but was dissolved in acetone and irradiated with light of  $\lambda > 400\text{nm}$  under continuous nitrogen purging for 18h to reach a complete conversion of **4b**, this gave **5b** (97.2%). The total yield of **5b** in photoreaction and in subsequent conversion of **4b** was 90.0%.

#### **4b**

MP 193-194 $^{\circ}\text{C}$

$^1\text{H-NMR}$  (300 MHz;  $\text{CDCl}_3$ )  $\delta$  3.01(3H, s,  $\text{NCH}_3$ ), 5.58(1H, s), 7.00(1H, d,  $J=7.5$ ), 7.04(1H, d,  $J=7.3$ ), 7.28-7.34(3H, m), 7.37-7.39(1H, m), 7.42-7.46(3H, m)

IR (KBr)  $\nu$  3063, 2983, 3948, 2363, 1790, 1723, 1592, 1465, 1426, 1369, 1284, 1227, 1117, 1078, 1016, 939, 832, 790, 753, 698 $\text{cm}^{-1}$

MS  $m/z$ (%) 337( $\text{M}^+-\text{HCl}$ , 92.87), 302 (57.69), 257 (4.08), 252 (8.21), 245 (Base), 223 (4.51), 217 (60.61), 194 (73.99), 189 (58.78), 187 (24.59), 165 (34.26), 151 (6.76), 139 (3.97), 126 (6.97), 94 (15.62), 87 (8.04), 82 (2.41), 63 (2.55)

EA Found: C, 60.99; H, 3.56; N, 3.88.  $\text{C}_{19}\text{H}_{13}\text{Cl}_2\text{N}_1\text{O}_3$  requires C, 60.98; H, 3.50; N, 3.74.

#### **5b**

MP 267-268 $^{\circ}\text{C}$

$^1\text{H-NMR}$  (300 MHz;  $\text{CDCl}_3$ )  $\delta$  3.31(3H, s,  $\text{NCH}_3$ ), 7.57(1H, t,  $J=7.5$ ), 7.66(1H, t,  $J=7.6$ ), 7.76(1H, t,  $J=7.6$ ), 7.84-7.90(2H, m), 8.45(1H, d,  $J=7.7$ ), 8.69(1H,  $J=8.3$ ), 9.18(1H, d,  $J=8.3$ )

IR (KBr)  $\nu$  3081, 1767, 1701, 1621, 1573, 1459, 1433, 1375, 1341, 1210, 1066, 993, 864, 757, 691, 611 $\text{cm}^{-1}$

MS  $m/z$ (%) 301( $\text{M}^+$ , Base), 273(2.05), 257(33.25), 244(6.29), 216(83.61), 187(35.03), 161(1.65), 151(3.09), 136(2.78), 122(2.12), 108(9.36), 94(8.99)

EA Found: C, 75.82; H, 3.72; N, 4.57.  $\text{C}_{19}\text{H}_{11}\text{N}_1\text{O}_3$  requires C, 75.74; H 3.68; N, 4.65.

UV (nm) (log  $\epsilon$ ): 403(4.06), 374(3.95), 279(4.22)

#### **6b**

MP 148-149 $^{\circ}\text{C}$

$^1\text{H-NMR}$  (300 MHz;  $\text{CDCl}_3$ )  $\delta$  3.12(3H, s,  $\text{NCH}_3$ ), 7.35(1H, t,  $J=7.5$ ), 7.44-7.48(6H, m), 7.64(1H, d,  $J=8.3$ ), 7.73(1H, d,  $J=7.8$ )

IR (KBr)  $\nu$  3040, 2940, 1785, 1720, 1628, 1567, 1437, 1379, 1250, 1163, 1111, 1004, 885, 858, 778, 745, 701 $\text{cm}^{-1}$

MS  $m/z$ (%) 337(M, 25.34), 302(39.51), 287(1.05), 257(4.07), 252(4.78), 245(Base), 223(3.01), 217(45.10), 189(41.41), 163(4.75), 151(4.22), 126(4.39), 94(11.29), 84(10.21), 63(1.29), 44(21.99)

EA Found: C, 67.48; H, 3.62; N, 4.11.  $\text{C}_{19}\text{H}_{12}\text{ClNO}_3$  requires C, 67.56; H, 3.58; N, 4.15.

**Photolysis of 1 with 2-phenylbenzothiophene (3c):** A solution of **1** (540 mg, 3 mmol) and **3c** (819 g, 3.9 mmol) in benzene (60 ml) was photolyzed for 27h to reach a 79.3% conversion of **1**. Work-up as described above gave **4c** (84.0%) and **5c** (7.36%).

Heating **4c** (100mg) on silica gel (1g) to 100 $^{\circ}\text{C}$  for 16h, and then dissolving the products in benzene (20 ml) and irradiating the solution with light of  $\lambda > 400\text{nm}$  under continuous nitrogen purging for 6h to reach a complete conversion of **4c**, this gave **5c** (93.9%). The total yield of **5c** in photoreaction and in subsequent conversion of **4c** was 86.5%.

#### **4c**

MP 150-151 $^{\circ}\text{C}$

$^1\text{H-NMR}$  (300 MHz;  $\text{CDCl}_3$ )  $\delta$  2.82(3H, s), 5.08(1H, s), 7.20-7.29(4H, m), 7.31-7.42(5H, m)

IR (KBr)  $\nu$  3059, 1786, 1724, 1580, 1468, 1446, 1430, 1373, 1286, 1257, 1194, 1176, 1157, 1123, 1087, 1070, 1014, 940, 895, 737, 696 $\text{cm}^{-1}$

MS  $m/z$ (%) 389( $M^+$ , 0.47), 353(40.28), 318(43.69), 261(56.63), 233(45.22), 210(base), 165(25.44), 116(20.75), 87(13.51), 44(2.53)

EA Found: C, 58.54; H, 3.52; N, 3.46.  $C_{19}H_{11}N_1O_2S_1Cl_2$  requires C, 58.46; H, 3.33; N, 3.59.

#### 5c

MP 244-245°C

$^1H$ -NMR (300 MHz;  $CDCl_3$ )  $\delta$  3.29(3H, s,  $NCH_3$ ), 7.57-7.61(2H, m), 7.70-7.74(2H, m), 7.93(1H, dd,  $J_1=7.1$ ,  $J_2=1.0$ ), 8.14(1H, dd,  $J_1=7.1$ ,  $J_2=1.2$ ), 9.13(1H, dd,  $J_1=8.1$ ,  $J_2=1.5$ ), 9.70(1H, dd,  $J_1=8.1$ ,  $J_2=1.3$ )

IR (KBr)  $\nu$  3058, 1758, 1702, 1545, 1450, 1441, 1381, 1327, 1258, 1243, 1075, 1003, 957, 752, 728,  $650cm^{-1}$

MS  $m/z$ (%) 317( $M^+$ , base), 273(13.64), 232(40.36), 187(11.34), 158(3.23), 116(13.04), 57(3.37), 44(5.67)

EA Found: C, 71.94; H, 3.50; N, 4.20.  $C_{19}H_{11}N_1O_2S_1$  requires C, 71.92; H, 3.47; N, 4.42.

UV (nm) (log  $\epsilon$ ): 405(3.74), 321(4.18), 302(4.42), 278(4.51)

**Photolysis of 1 with 3-phenylbenzothiophene (3d):** A solution of **1** (540 mg, 3 mmol) and **3d** (819 g, 3.9 mmol) in benzene (60 ml) was photolyzed for 44h to reach a 94.8% conversion of **1**. Work-up as described above gave **4d** (74.8%) and **5d** (8.33%).

Heating **4d** (100mg) absorbed on silica gel (1g) at 100°C for 6h, and then dissolving the products in benzene (20 ml) and irradiating the solution with light of  $\lambda > 400nm$  under continuous nitrogen purging for 8h to reach a complete conversion of **4d**, this gave **5d** (85.5%). The total yield of **5d** in photoreaction and in subsequent conversion of **4d** was 72.3%.

#### 4d

MP 215-216°C

$^1H$ -NMR (300 MHz;  $CDCl_3$ )  $\delta$  3.05(3H, s), 4.89(1H, s), 7.09-7.14(1H, m), 7.24-7.27(2H, m), 7.29-7.39(4H, m), 7.55-7.58(2H, m)

IR (KBr)  $\nu$  3059, 2973, 1792, 1718, 1463, 1448, 1423, 1368, 1277, 1126, 1012, 941, 749, 727, 700,  $631cm^{-1}$

MS  $m/z$ (%) 354( $M^+-Cl$ , 43.25), 318(27.74), 261(39.58), 210(base), 165(36.24), 116(16.83), 87(20.35), 45(10.39)

EA Found: C, 58.43; H, 3.24; N, 3.43.  $C_{19}H_{11}N_1O_2S_1Cl_2$  requires C, 58.46; H, 3.33; N, 3.59.

#### 5d

MP 251-252°C

$^1H$ -NMR (300 MHz;  $CDCl_3$ )  $\delta$  3.30(3H, s), 7.62(1H, td,  $J_1=7.4$ ,  $J_2=1.5$ ), 7.68(1H, td,  $J_1=7.6$ ,  $J_2=1.4$ ), 7.77(1H, td,  $J_1=7.6$ ,  $J_2=1.0$ ), 7.87(1H, ddd,  $J_1=8.5$ ,  $J_2=7.0$ ,  $J_3=1.5$ ), 8.10(1H, dd,  $J_1=8.1$ ,  $J_2=1.5$ ), 8.89(1H, dd,  $J_1=8.0$ ,  $J_2=1.3$ ), 9.08(1H, d,  $J=8.6$ ), 9.17(1H, dd,  $J_1=8.7$ ,  $J_2=1.1$ )

IR (KBr)  $\nu$  3059, 2939, 1764, 1695, 1551, 1450, 1421, 1386, 1371, 1361, 1327, 1256, 1185, 1059, 991, 780, 755, 732,  $663cm^{-1}$

MS  $m/z$ (%) 317( $M^+$ , base), 273(5.54), 232(44.04), 187(13.05), 116(10.07), 43(18.14)

EA Found: C, 71.87; H, 3.36; N, 4.58.  $C_{19}H_{11}N_1O_2S_1$  requires C, 71.92; H, 3.47; N, 4.42.

UV (nm) (log  $\epsilon$ ): 401(4.00), 279(4.40)

**Photolysis of 2 with 2-phenylbenzofuran (3a):** A solution of **2** (645 mg, 3 mmol) and **3a** (756 mg, 3.9 mmol) in benzene (60 ml) was photolyzed for 48h to reach a 42.6% conversion of **2**. After evaporation of the solvent, the reaction mixture was separated by flash column chromatography on silica gel with petroleum ether (b.p. 60-90°C) ethyl acetate as eluents to give **7a**(58.4%).

#### 7a

MP 189-190°C

$^1H$ -NMR (300 MHz;  $CDCl_3$ )  $\delta$  7.36(1H, m), 7.44-7.57(4H, m), 7.66-7.70(2H, m), 7.80(1H, t,  $J=8.0$ ), 8.33(1H, d,  $J=7.9$ ), 8.52(1H, d,  $J=7.2$ ), 8.81(1H, d,  $J=8.5$ ), 9.18(1H, d,  $J=7.9$ )

IR (KBr)  $\nu$  3059, 2922, 1736, 1608, 1487, 1368, 1347, 1225, 1060, 976,  $740cm^{-1}$

MS  $m/z$ (%) 336( $M^+$ , Base), 308(26.65), 279(19.32), 250(15.84), 154(5.61), 125(6.22)

EA Found: C, 82.35; H, 3.41.  $C_{23}H_{12}O_3$  requires C, 82.13; H, 3.60.

UV (nm) (log  $\epsilon$ ): 403(4.36), 384(4.32), 342(4.21), 327(4.19), 291(4.59)

**Photolysis of 2 with 3-phenylbenzofuran (3b):** A solution of **2** (645 mg, 3 mmol) and **3b** (756 mg, 3.9 mmol) in benzene (60 ml) was photolyzed for 48h to reach a 35.7% conversion of **2**. Work-up as described above gave **7b** (70.8%).

#### 7b

MP 204-5°C

$^1H$ -NMR (300 MHz;  $CDCl_3$ )  $\delta$  7.45(1H, td,  $J_1=4.1$ ,  $J_2=1.9$ ), 7.51-7.62(3H, m), 7.70(1H, t,  $J=7.8$ ), 7.90(2H, t,  $J=7.8$ ), 8.39(1H, d,  $J=7.5$ ), 8.47(1H, d,  $J=8.1$ ), 8.73(1H, d,  $J=8.3$ ), 8.93(1H, d,  $J=8.6$ )

IR (KBr)  $\nu$  3080, 1745, 1612, 1550, 1464, 1353, 1271, 1213, 1178, 1110, 1056, 1026, 759,  $687cm^{-1}$

MS  $m/z$ (%) 337( $M^++1$ , 12.31), 336( $M^+$ , Base), 308(60.63), 279(19.27), 250(11.08), 224(2.82), 168(2.52), 154(4.23), 140(4.39), 125(7.88), 112(3.63)

EA Found: C, 81.96; H, 3.55.  $C_{23}H_{12}O_3$  requires C, 82.13; H, 3.60.

UV (nm) (log  $\epsilon$ ): 410(4.20), 391(4.20), 347(4.13), 331(3.96), 280(4.36)

**Photolysis of 2 with 3-phenylbenzothiophene (3d):** A solution of **2** (645 mg, 3 mmol) and **3d** (819 mg, 3.9 mmol) in benzene (60 ml) was photolyzed for 72h to reach a 36.1% conversion of **2**. Work-up as described above gave **7d** (66.6%).

**7d**

MP 219-221 °C

<sup>1</sup>H-NMR (300 MHz; CDCl<sub>3</sub>) δ 7.45-7.49(1H, m), 7.57-7.67(4H, m), 7.75(1H, td, *J*=7.2), 7.93(1H, t, *J*=7.2), 8.14(1H, d, *J*=7.5), 8.50(1H, d, *J*=8.0), 8.85(1H, d, *J*=8.0), 8.98(1H, d, *J*=8.5), 9.18(1H, d, *J*=8.5)

IR (KBr) ν 3052, 1712, 1607, 1531, 1454, 1359, 1252, 1190, 1127, 1112, 1007, 764, 753, 727, 660 cm<sup>-1</sup>

MS *m/z*(%) 352(base), 324(13.95), 295(13.05), 44(15.22)

EA Found: C, 78.38; H, 3.49. C<sub>23</sub>H<sub>12</sub>O<sub>2</sub>S<sub>1</sub> requires C, 78.40; H, 3.41.

UV (nm) (log ε): 418(3.96), 398(3.90), 366(4.19), 352(4.06), 323(4.01), 310(3.96), 280(4.52)

**X-ray Crystallographic Study:**

Crystal data for **4a** (Fig. 1): C<sub>19</sub>H<sub>13</sub>Cl<sub>2</sub>NO<sub>3</sub>, M = 374.20, colorless blocks, Enraf-Nonius CAD4 diffractometer, Mo-*K*<sub>α</sub> radiation (λ = 0.71073 Å), 0.40 × 0.30 × 0.28 mm, T = 293(2) K. Monoclinic, space group *P*2<sub>1</sub>/*c*, a = 12.895(3) Å, b = 9.910(2) Å, c = 13.175(3) Å, α = 90.00°, β = 90.54(3)°, γ = 90.00°, V = 1683.6(6) Å<sup>3</sup>, Z = 4, D<sub>c</sub> = 1.476 g cm<sup>-3</sup>, μ = 0.404 mm<sup>-1</sup>, F(000) = 768.00. The structure was solved by direct method (SHELXL) and refined on F<sup>2</sup> by full-matrix least-squares method. A total of 2971 independent reflections [R (int) = 0.0426] were used in the refinement, which converged with R = 0.0536 and wR = 0.1931 (GOF = 1.004).

Crystal data for **5b** (Fig. 2): C<sub>19</sub>H<sub>11</sub>NO<sub>3</sub>, M = 301.29, yellow needles, Enraf-Nonius CAD4 diffractometer, Mo-*K*<sub>α</sub> radiation (λ = 0.71073 Å), 0.42 × 0.30 × 0.24 mm, T = 293(2) K. Monoclinic, space group *P*2<sub>1</sub>/*c*, a = 9.5260(19) Å, b = 18.319(4) Å, c = 7.9420(16) Å, α = 90.00°, β = 96.25(3)°, γ = 90.00°, V = 1377.7(5) Å<sup>3</sup>, Z = 4, D<sub>c</sub> = 1.453 g cm<sup>-3</sup>, μ = 0.099 mm<sup>-1</sup>, F(000) = 624.00. The structure was solved by direct method (SHELXL) and refined on F<sup>2</sup> by full-matrix least-squares method. A total of 2439 independent reflections [R (int) = 0.0433] were used in the refinement, which converged with R = 0.0551 and wR = 0.1188 (GOF = 1.000).

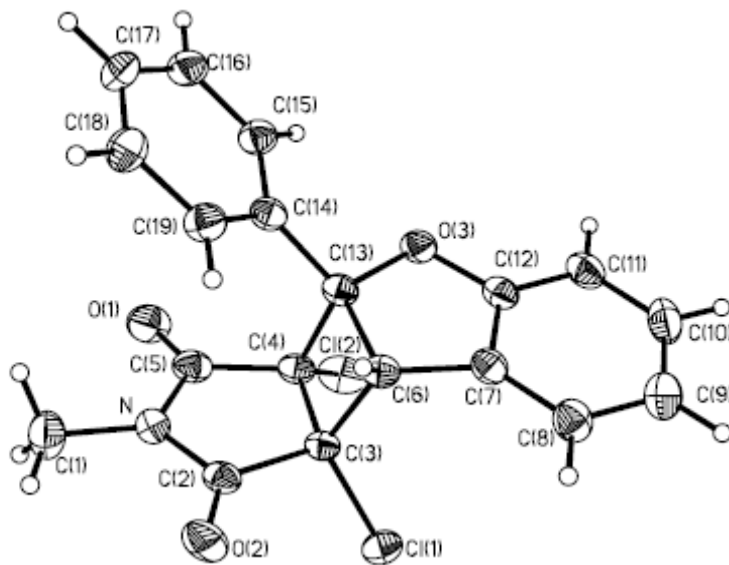

**Fig. 1** ORTEP drawing of **4a**

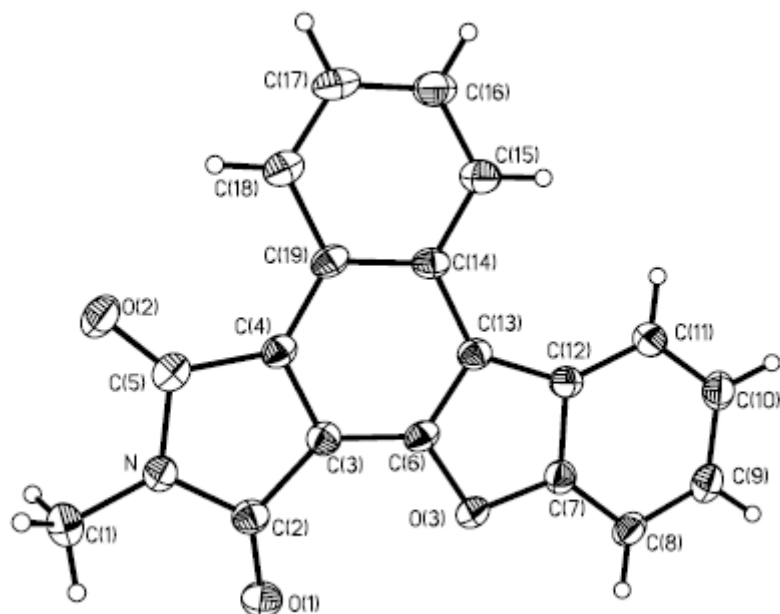

Fig. 2 ORTEP drawing of **5b**

**Table** Luminescence Quantum Yield

| Compd <sup>a</sup> | $\lambda_{\text{ex}}$ <sup>b</sup> (nm) | $\lambda_{\text{em}}$ <sup>c</sup> (nm) | $\Phi_f$ <sup>d</sup> |
|--------------------|-----------------------------------------|-----------------------------------------|-----------------------|
| <b>5a</b>          | 342                                     | 450                                     | 0.41                  |
| <b>5b</b>          | 372                                     | 453                                     | 0.63                  |
| <b>5c</b>          | 405                                     | 463                                     | 0.33                  |
| <b>5d</b>          | 402                                     | 461                                     | 0.38                  |
| <b>7a</b>          | 403                                     | 441                                     | 0.2                   |
| <b>7b</b>          | 347                                     | 449                                     | 0.73                  |
| <b>7d</b>          | 406                                     | 440                                     | 0.42                  |

<sup>a</sup> Correct emission spectra were obtained in dilute benzene solution. <sup>b</sup> Only the absorption maxima appropriate to measure the quantum yield are shown. <sup>c</sup> Emission maximum wavelength excited at the absorption maximum. <sup>d</sup> Quantum efficiencies of **5a** and **7b** using quinine sulfate in 0.1N H<sub>2</sub>SO<sub>4</sub> as a standard at the corresponding absorption maximum. The others were measured using **5a** in benzene as a standard at the corresponding absorption maximum.

#### DFT calculation results:

Optimized structures of triplet diradical intermediates **A(1, 3a)**, **A(1, 3b)**, **E(2, 3a)** and **E(2, 3b)**

Provided are the Cartesian coordinates for **A(1, 3a)**, **A(1, 3b)**, **E(2, 3a)** and **E(2, 3b)** along with the  $S^2$  values. The structural optimizations were performed by standard procedures within Gaussian 03 package.

|                 |
|-----------------|
| <b>A(1, 3a)</b> |
|-----------------|

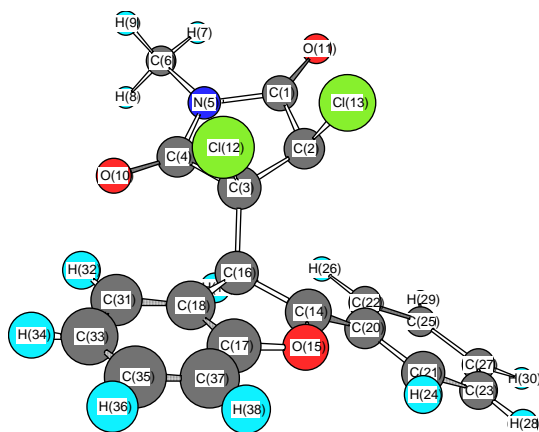

SCF Done:  
E(UB+HF-LYP) =  
-1932.27632326

S\*\*2 = 2.0328

S\*\*2 before  
annihilation 2.0328, after  
2.0006

| Center Number | Atomic Number | Coordinates (Angstroms) |           |           | Total atomic spin densities: |
|---------------|---------------|-------------------------|-----------|-----------|------------------------------|
|               |               | X                       | Y         | Z         |                              |
| 1             | 6             | 1.502419                | 2.682500  | 0.265718  | 1 C -0.101489                |
| 2             | 6             | 1.009398                | 1.384016  | 0.713377  | 2 C 0.752716                 |
| 3             | 6             | -0.331964               | 1.097725  | 0.156376  | 3 C -0.045619                |
| 4             | 6             | -0.553486               | 2.312712  | -0.782348 | 4 C 0.000520                 |
| 5             | 7             | 0.521442                | 3.173703  | -0.635875 | 5 N 0.054859                 |
| 6             | 6             | 0.642415                | 4.449540  | -1.336838 | 6 C -0.005172                |
| 7             | 1             | 1.663123                | 4.808251  | -1.200739 | 7 H -0.000116                |
| 8             | 1             | 0.425767                | 4.307659  | -2.397943 | 8 H 0.003946                 |
| 9             | 1             | -0.060822               | 5.179959  | -0.926217 | 9 H 0.004746                 |
| 10            | 8             | -1.497286               | 2.473336  | -1.564003 | 10 O -0.001496               |
| 11            | 8             | 2.550145                | 3.274299  | 0.560714  | 11 O 0.152371                |
| 12            | 17            | -1.568828               | 1.378529  | 1.639116  | 12 Cl 0.112893               |
| 13            | 17            | 1.822191                | 0.513903  | 1.999944  | 13 Cl 0.093494               |
| 14            | 6             | 0.093430                | -1.494322 | -0.090109 | 14 C 0.682369                |
| 15            | 8             | 0.827614                | -2.406269 | 0.473456  | 15 O 0.066222                |
| 16            | 6             | -0.633514               | -0.259947 | -0.590037 | 16 C -0.043056               |
| 17            | 6             | -2.121124               | -1.950731 | 0.155382  | 17 C -0.009602               |
| 18            | 6             | -2.085841               | -0.722156 | -0.508824 | 18 C 0.025332                |
| 19            | 1             | -0.346220               | -0.055413 | -1.632692 | 19 H 0.027120                |
| 20            | 6             | 1.408388                | -1.955066 | -0.353847 | 20 C -0.225399               |
| 21            | 6             | 1.835884                | -3.234088 | 0.108739  | 21 C 0.243823                |
| 22            | 6             | 2.336385                | -1.171241 | -1.098417 | 22 C 0.241698                |
| 23            | 6             | 3.122251                | -3.689471 | -0.158397 | 23 C -0.137704               |
| 24            | 1             | 1.139174                | -3.844159 | 0.670184  | 24 H -0.009777               |
| 25            | 6             | 3.618627                | -1.643124 | -1.360512 | 25 C -0.136369               |
| 26            | 1             | 2.042289                | -0.196047 | -1.473844 | 26 H -0.009820               |
| 27            | 6             | 4.024828                | -2.902421 | -0.892323 | 27 C 0.253438                |
| 28            | 1             | 3.428636                | -4.665553 | 0.204656  | 28 H 0.004449                |
| 29            | 1             | 4.307612                | -1.029759 | -1.932559 | 29 H 0.004487                |
| 30            | 1             | 5.027084                | -3.263929 | -1.096217 | 30 H -0.011084               |
| 31            | 6             | -3.277746               | -0.147875 | -0.948026 | 31 C -0.004579               |
| 32            | 1             | -3.271423               | 0.809807  | -1.453919 | 32 H 0.000166                |
| 33            | 6             | -4.479498               | -0.829147 | -0.697938 | 33 C 0.011984                |
| 34            | 1             | -5.416395               | -0.397942 | -1.033652 | 34 H -0.000474               |
| 35            | 6             | -4.485862               | -2.054337 | -0.013948 | 35 C -0.004878               |
| 36            | 1             | -5.426843               | -2.561173 | 0.172850  | 36 H 0.000136                |
| 37            | 6             | -3.291413               | -2.642230 | 0.428290  | 37 C 0.010211                |
| 38            | 1             | -3.272657               | -3.591916 | 0.947968  | 38 H -0.000346               |

A(1, 3b)

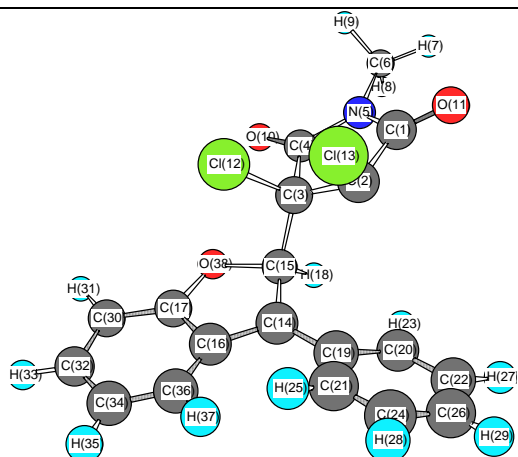

SCF Done:  
E(UB+HF-LYP) =  
-1932.27715920

S\*\*2 = 2.0353

S\*\*2 before  
annihilation 2.0353, after  
2.0008

| Center Number | Atomic Number | Coordinates (Angstroms) |           |           | Total atomic spin densities: |
|---------------|---------------|-------------------------|-----------|-----------|------------------------------|
|               |               | X                       | Y         | Z         |                              |
| 1             | 6             | -3.269743               | 0.371772  | 0.175277  | 1 C -0.103470                |
| 2             | 6             | -1.859839               | 0.455706  | 0.542806  | 2 C 0.772671                 |
| 3             | 6             | -1.118100               | -0.767154 | 0.143215  | 3 C -0.049598                |
| 4             | 6             | -2.243582               | -1.618022 | -0.525289 | 4 C -0.000835                |
| 5             | 7             | -3.421384               | -0.875728 | -0.471517 | 5 N 0.061464                 |
| 6             | 6             | -4.696326               | -1.360834 | -0.993206 | 6 C -0.006069                |
| 7             | 1             | -5.444603               | -0.590678 | -0.804220 | 7 H -0.000068                |
| 8             | 1             | -4.616726               | -1.552640 | -2.066534 | 8 H 0.005683                 |
| 9             | 1             | -4.978602               | -2.289764 | -0.490724 | 9 H 0.004218                 |
| 10            | 8             | -2.139961               | -2.730709 | -1.038659 | 10 O 0.003050                |
| 11            | 8             | -4.180825               | 1.191037  | 0.367242  | 11 O 0.144277                |
| 12            | 17            | -0.600903               | -1.697662 | 1.742041  | 12 Cl 0.087730               |
| 13            | 17            | -1.306466               | 1.723931  | 1.621257  | 13 Cl 0.093286               |
| 14            | 6             | 1.286737                | 0.238938  | -0.384141 | 14 C 0.653062                |
| 15            | 6             | 0.119247                | -0.640913 | -0.810524 | 15 C -0.036165               |
| 16            | 6             | 2.391456                | -0.637978 | -0.130580 | 16 C -0.200607               |
| 17            | 6             | 1.993977                | -1.955841 | -0.481793 | 17 C 0.179416                |
| 18            | 1             | -0.289119               | -0.360671 | -1.790364 | 18 H 0.027696                |
| 19            | 6             | 1.274691                | 1.685008  | -0.459658 | 19 C -0.161444               |
| 20            | 6             | 0.415797                | 2.367737  | -1.361551 | 20 C 0.158049                |
| 21            | 6             | 2.132306                | 2.476836  | 0.348060  | 21 C 0.158163                |
| 22            | 6             | 0.430247                | 3.757544  | -1.462394 | 22 C -0.088357               |
| 23            | 1             | -0.250177               | 1.803885  | -2.006761 | 23 H -0.006570               |
| 24            | 6             | 2.137874                | 3.867123  | 0.246436  | 24 C -0.088162               |
| 25            | 1             | 2.754795                | 1.997306  | 1.093041  | 25 H -0.006952               |
| 26            | 6             | 1.292596                | 4.518483  | -0.661733 | 26 C 0.161019                |
| 27            | 1             | -0.230369               | 4.249773  | -2.169044 | 27 H 0.003321                |
| 28            | 1             | 2.795592                | 4.446856  | 0.886443  | 28 H 0.003090                |
| 29            | 1             | 1.299763                | 5.600513  | -0.739023 | 29 H -0.007026               |
| 30            | 6             | 2.824296                | -3.059172 | -0.411572 | 30 C -0.103612               |
| 31            | 1             | 2.464880                | -4.040576 | -0.693641 | 31 H 0.003132                |
| 32            | 6             | 4.139605                | -2.841078 | 0.030618  | 32 C 0.222918                |
| 33            | 1             | 4.822269                | -3.680505 | 0.107210  | 33 H -0.009942               |
| 34            | 6             | 4.584659                | -1.547058 | 0.361230  | 34 C -0.105828               |
| 35            | 1             | 5.610948                | -1.402429 | 0.681762  | 35 H 0.003161                |
| 36            | 6             | 3.732692                | -0.444244 | 0.277188  | 36 C 0.210280                |
| 37            | 1             | 4.108325                | 0.543839  | 0.507743  | 37 H -0.007476               |
| 38            | 8             | 0.685343                | -1.990641 | -0.959292 | 38 O 0.026495                |

**E(2, 3a)**

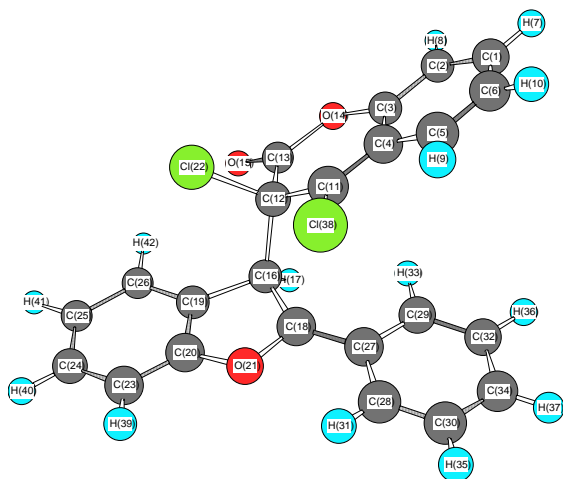

SCF Done:  
E(UB+HF-LYP) =  
-2020.35494883

S\*\*2 = 2.0431

S\*\*2 before  
annihilation 2.0431, after  
2.0012

| Center Number | Atomic Number | Coordinates (Angstroms) |           |           | Total atomic spin densities: |
|---------------|---------------|-------------------------|-----------|-----------|------------------------------|
|               |               | X                       | Y         | Z         |                              |
| 1             | 6             | -4.982791               | -1.559010 | -0.178238 | 1 C 0.243765                 |
| 2             | 6             | -3.916323               | -2.180125 | -0.826572 | 2 C -0.120745                |
| 3             | 6             | -2.617568               | -1.843723 | -0.494549 | 3 C 0.200590                 |
| 4             | 6             | -2.328007               | -0.876995 | 0.496436  | 4 C -0.194162                |
| 5             | 6             | -3.432443               | -0.255921 | 1.144641  | 5 C 0.219995                 |
| 6             | 6             | -4.730940               | -0.592586 | 0.810545  | 6 C -0.119289                |
| 7             | 1             | -5.996234               | -1.823292 | -0.438387 | 7 H -0.011116                |
| 8             | 1             | -4.067596               | -2.928423 | -1.587059 | 8 H 0.004030                 |
| 9             | 1             | -3.231396               | 0.487037  | 1.897751  | 9 H -0.009452                |
| 10            | 1             | -5.553766               | -0.107828 | 1.313281  | 10 H 0.003981                |
| 11            | 6             | -0.980525               | -0.580131 | 0.777230  | 11 C 0.645176                |
| 12            | 6             | 0.167145                | -1.193665 | 0.062440  | 12 C -0.011477               |
| 13            | 6             | -0.242487               | -2.253268 | -0.980650 | 13 C 0.005355                |
| 14            | 8             | -1.594819               | -2.503659 | -1.182201 | 14 O 0.004595                |
| 15            | 8             | 0.564139                | -2.828893 | -1.685814 | 15 O 0.021227                |
| 16            | 6             | 1.108943                | -0.128075 | -0.689642 | 16 C -0.033583               |
| 17            | 1             | 0.798826                | -0.156628 | -1.736674 | 17 H 0.024548                |
| 18            | 6             | 1.010556                | 1.297619  | -0.177000 | 18 C 0.647605                |
| 19            | 6             | 2.614144                | -0.377564 | -0.546365 | 19 C 0.027145                |
| 20            | 6             | 3.181793                | 0.700112  | 0.131851  | 20 C -0.009087               |
| 21            | 8             | 2.231087                | 1.699026  | 0.416386  | 21 O 0.081872                |
| 22            | 17            | 1.168871                | -2.172438 | 1.379723  | 22 Cl 0.110407               |
| 23            | 6             | 4.526333                | 0.764706  | 0.445936  | 23 C 0.010126                |
| 24            | 6             | 5.331312                | -0.306311 | 0.037839  | 24 C -0.003476               |
| 25            | 6             | 4.785303                | -1.391247 | -0.654573 | 25 C 0.012406                |
| 26            | 6             | 3.415366                | -1.437804 | -0.946886 | 26 C -0.003506               |
| 27            | 6             | 0.043601                | 2.296496  | -0.438234 | 27 C -0.198812               |
| 28            | 6             | 0.260144                | 3.623359  | 0.026685  | 28 C 0.221626                |
| 29            | 6             | -1.146947               | 2.027438  | -1.166737 | 29 C 0.218948                |
| 30            | 6             | -0.670362               | 4.618887  | -0.225043 | 30 C -0.119360               |
| 31            | 1             | 1.165473                | 3.833358  | 0.572223  | 31 H -0.009726               |
| 32            | 6             | -2.065303               | 3.038206  | -1.413743 | 32 C -0.118284               |
| 33            | 1             | -1.340829               | 1.030731  | -1.533328 | 33 H -0.009755               |
| 34            | 6             | -1.840024               | 4.339281  | -0.945499 | 34 C 0.234709                |
| 35            | 1             | -0.488093               | 5.621117  | 0.136406  | 35 H 0.004138                |
| 36            | 1             | -2.961706               | 2.815606  | -1.974996 | 36 H 0.004103                |
| 37            | 1             | -2.560738               | 5.120155  | -1.140371 | 37 H -0.010939               |
| 38            | 17            | -0.581963               | 0.522916  | 2.136500  | 38 Cl 0.037074               |
| 39            | 1             | 4.929363                | 1.614156  | 0.972985  | 39 H -0.000354               |
| 40            | 1             | 6.387858                | -0.286612 | 0.261738  | 40 H 0.000093                |
| 41            | 1             | 5.422267                | -2.207950 | -0.959541 | 41 H -0.000458               |
| 42            | 1             | 2.970364                | -2.279416 | -1.446004 | 42 H 0.000068                |



## E(2, 3b)

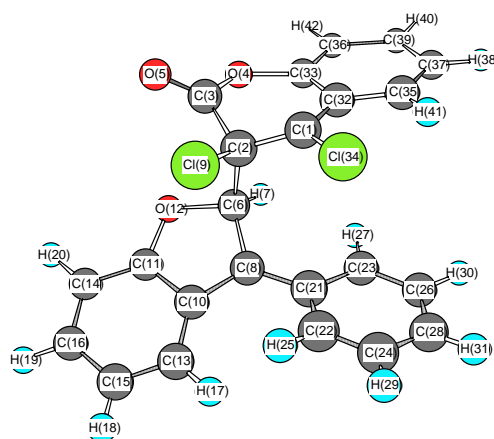

SCF Done:  
E(UB+HF-LYP) =  
-2020.35512157

S\*\*2 = 2.0480

S\*\*2 before  
annihilation 2.0480, after  
2.0015

| Center Number | Atomic Number | Coordinates (Angstroms) |           |           | Total atomic spin densities: |
|---------------|---------------|-------------------------|-----------|-----------|------------------------------|
|               |               | X                       | Y         | Z         |                              |
| 1             | 6             | -1.521046               | -0.151112 | 0.944771  | 1 C 0.691913                 |
| 2             | 6             | -0.365863               | -1.073164 | 0.724098  | 2 C -0.024610                |
| 3             | 6             | -0.896523               | -2.499933 | 0.485386  | 3 C 0.008656                 |
| 4             | 8             | -1.919713               | -2.525916 | -0.489788 | 4 O 0.011878                 |
| 5             | 8             | -0.509398               | -3.532509 | 0.970076  | 5 O 0.038082                 |
| 6             | 6             | 0.448997                | -0.695440 | -0.561660 | 6 C -0.013321                |
| 7             | 1             | -0.267504               | -0.630454 | -1.387518 | 7 H 0.026607                 |
| 8             | 6             | 1.379392                | 0.500401  | -0.445973 | 8 C 0.635074                 |
| 9             | 17            | 0.786028                | -1.150208 | 2.181334  | 9 Cl 0.013254                |
| 10            | 6             | 2.711813                | -0.006107 | -0.520502 | 10 C -0.183338               |
| 11            | 6             | 2.642998                | -1.409762 | -0.736573 | 11 C 0.164875                |
| 12            | 8             | 1.327791                | -1.859718 | -0.820189 | 12 O 0.033645                |
| 13            | 6             | 3.983099                | 0.607129  | -0.504477 | 13 C 0.207895                |
| 14            | 6             | 3.761795                | -2.201216 | -0.891921 | 14 C -0.093579               |
| 15            | 6             | 5.118467                | -0.185413 | -0.656402 | 15 C -0.099622               |
| 16            | 6             | 5.015292                | -1.574134 | -0.838420 | 16 C 0.221121                |
| 17            | 1             | 4.075444                | 1.678946  | -0.396860 | 17 H -0.008553               |
| 18            | 1             | 6.097737                | 0.277591  | -0.640548 | 18 H 0.003181                |
| 19            | 1             | 5.912632                | -2.170263 | -0.950359 | 19 H -0.010336               |
| 20            | 1             | 3.661434                | -3.265522 | -1.051751 | 20 H 0.002986                |
| 21            | 6             | 0.931208                | 1.874291  | -0.402284 | 21 C -0.145385               |
| 22            | 6             | 1.679104                | 2.867613  | 0.274967  | 22 C 0.142691                |
| 23            | 6             | -0.262117               | 2.275727  | -1.051624 | 23 C 0.139823                |
| 24            | 6             | 1.262671                | 4.195006  | 0.282545  | 24 C -0.075496               |
| 25            | 1             | 2.556912                | 2.576212  | 0.836472  | 25 H -0.006617               |
| 26            | 6             | -0.667469               | 3.605555  | -1.044517 | 26 C -0.074909               |
| 27            | 1             | -0.859503               | 1.542555  | -1.579591 | 27 H -0.006425               |
| 28            | 6             | 0.092437                | 4.575142  | -0.381648 | 28 C 0.144055                |
| 29            | 1             | 1.844699                | 4.935170  | 0.819584  | 29 H 0.003052                |
| 30            | 1             | -1.576568               | 3.890275  | -1.561822 | 30 H 0.003100                |
| 31            | 1             | -0.227401               | 5.610278  | -0.376315 | 31 H -0.006686               |
| 32            | 6             | -2.669350               | -0.270907 | 0.140421  | 32 C -0.203794               |
| 33            | 6             | -2.813489               | -1.460319 | -0.629886 | 33 C 0.204974                |
| 34            | 17            | -1.365272               | 1.236311  | 2.077872  | 34 Cl 0.036895               |
| 35            | 6             | -3.682567               | 0.719316  | 0.016796  | 35 C 0.227627                |
| 36            | 6             | -3.873895               | -1.629720 | -1.504978 | 36 C -0.121338               |
| 37            | 6             | -4.743979               | 0.538924  | -0.853632 | 37 C -0.121720               |
| 38            | 1             | -5.502179               | 1.307297  | -0.941016 | 38 H 0.004063                |
| 39            | 6             | -4.841098               | -0.630350 | -1.626680 | 39 C 0.247418                |
| 40            | 1             | -5.671000               | -0.766500 | -2.308424 | 40 H -0.011327               |
| 41            | 1             | -3.589506               | 1.621101  | 0.606060  | 41 H -0.009838               |
| 42            | 1             | -3.936740               | -2.554443 | -2.062050 | 42 H 0.004026                |

# Title: Aromatic Annulation Strategy for Naphthalenes Fused at 1,2- and 3,4- Positions with Two Heterocycles

Author: Min Zhang, Hui-Ying An, Bao-Guo Zhao and Jian-Hua Xu\*

<sup>1</sup>HNMR spectra of all the new compounds (4a, 5a, 6a, 4b, 5b, 6b, 4c, 5c, 4d, 5d, 7a, 7b, 7c):

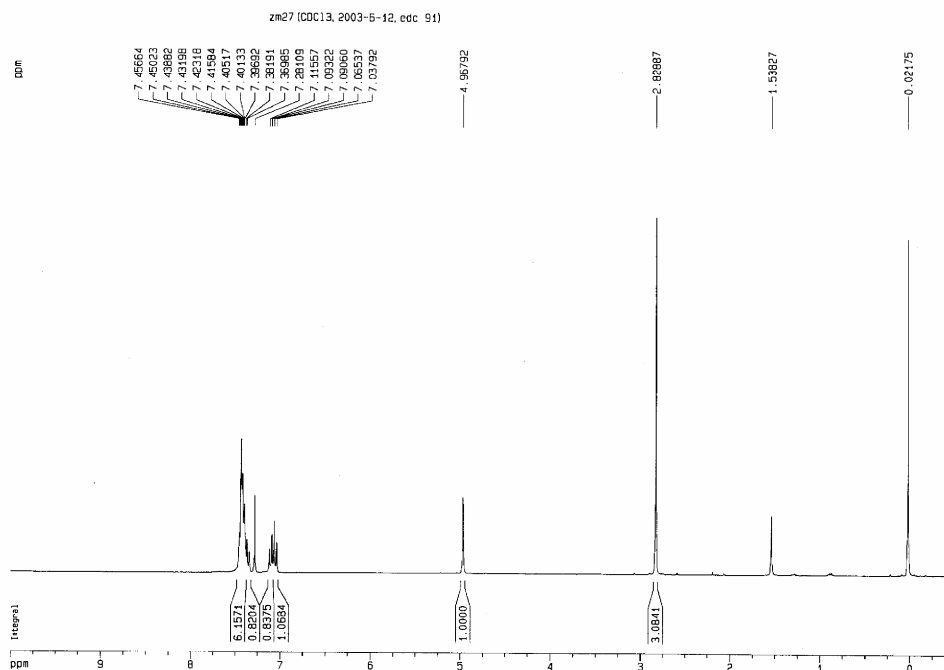

4a

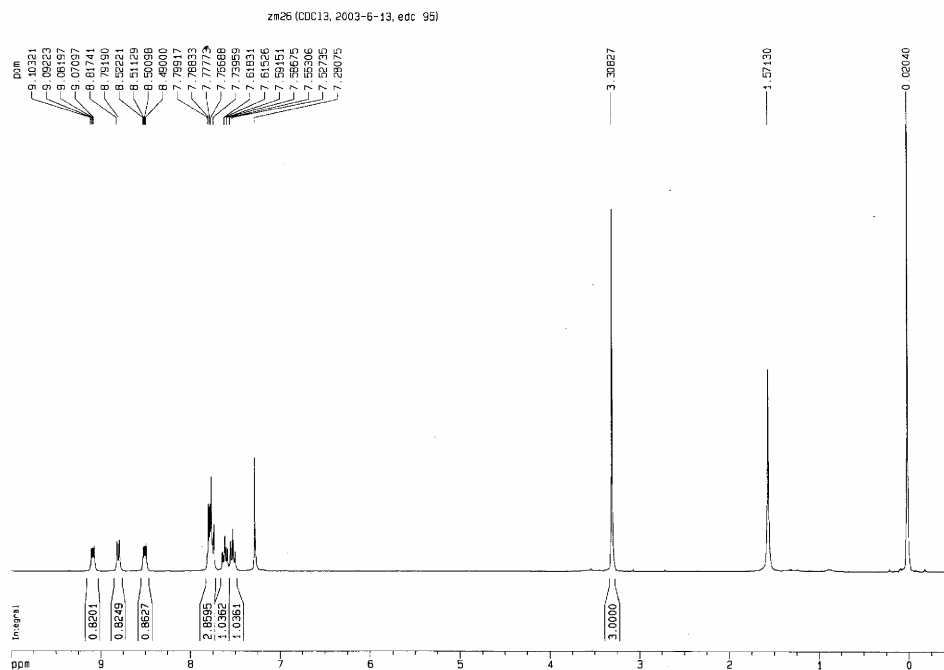

5a

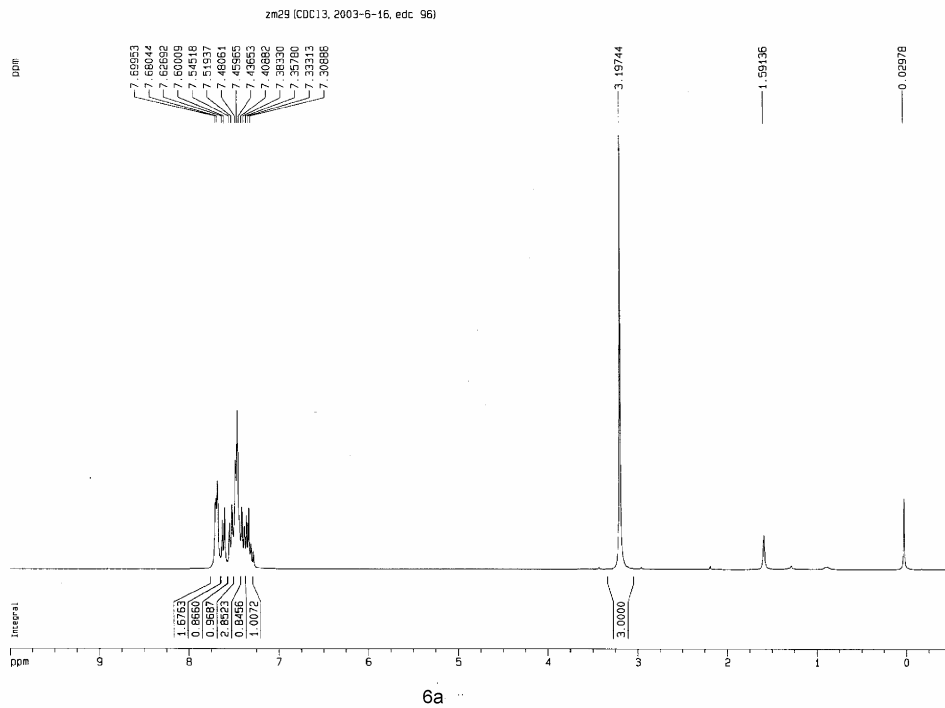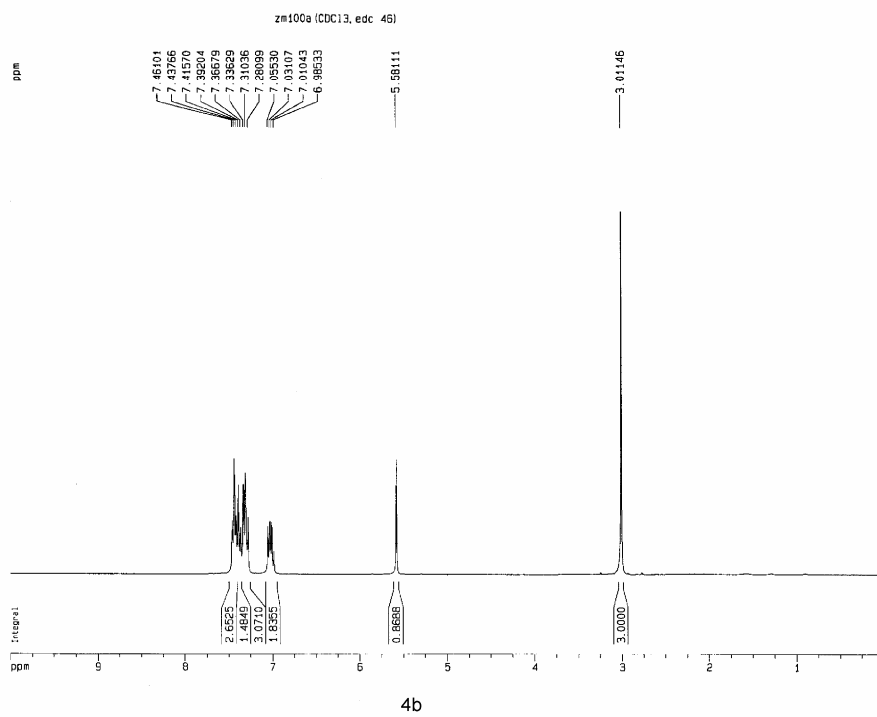

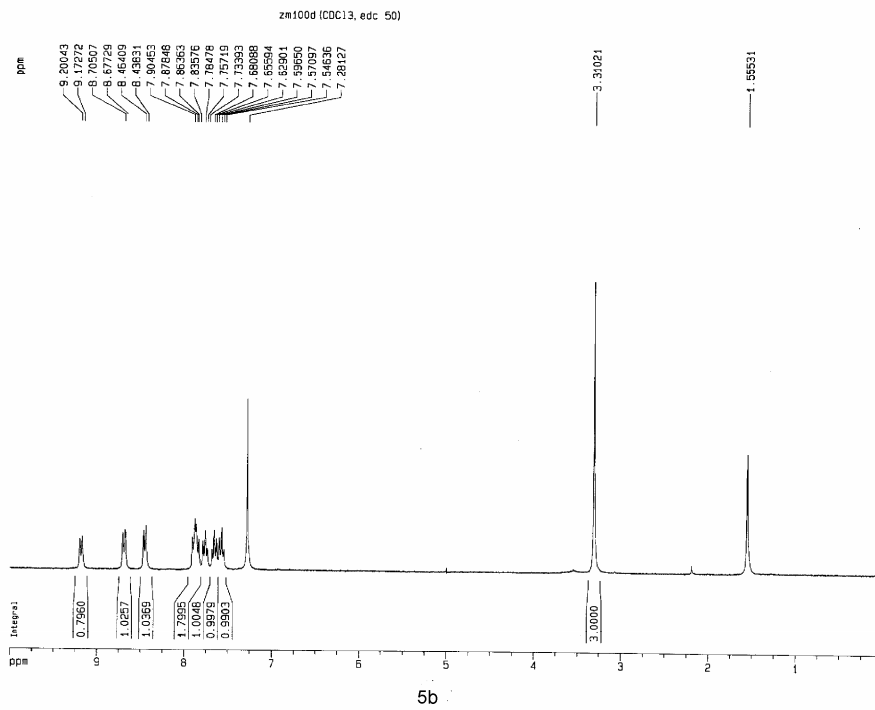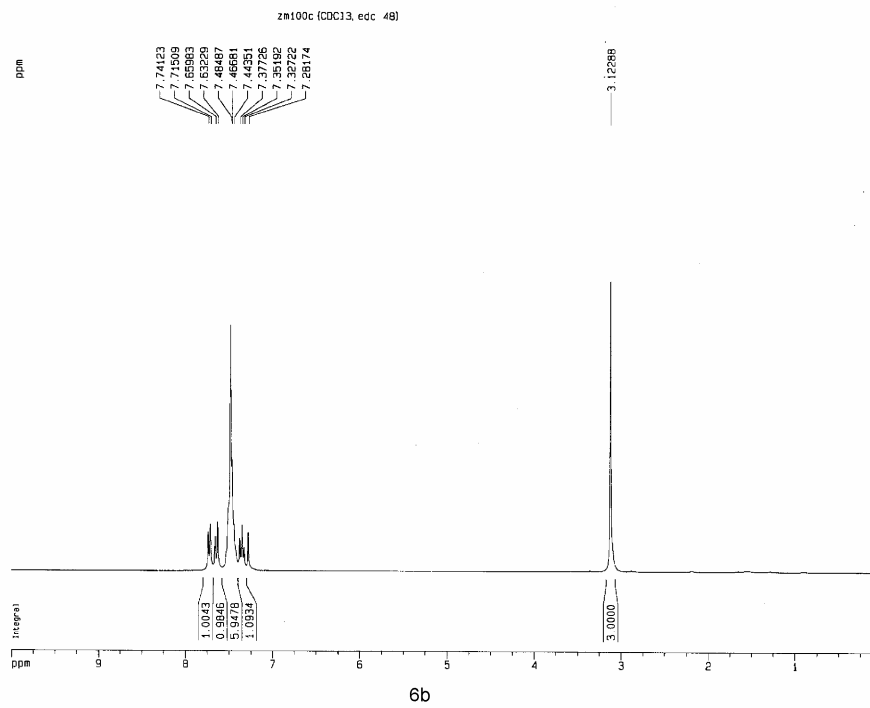

anhy15 (cd 16) 2004.11.25

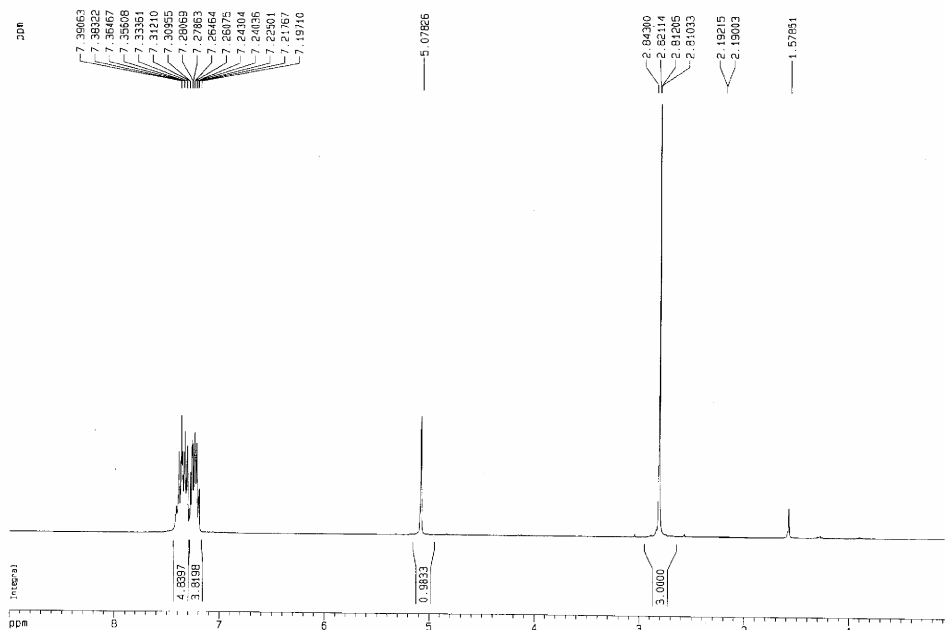

4c

anhy13 (EOC 14) 2004.11.25

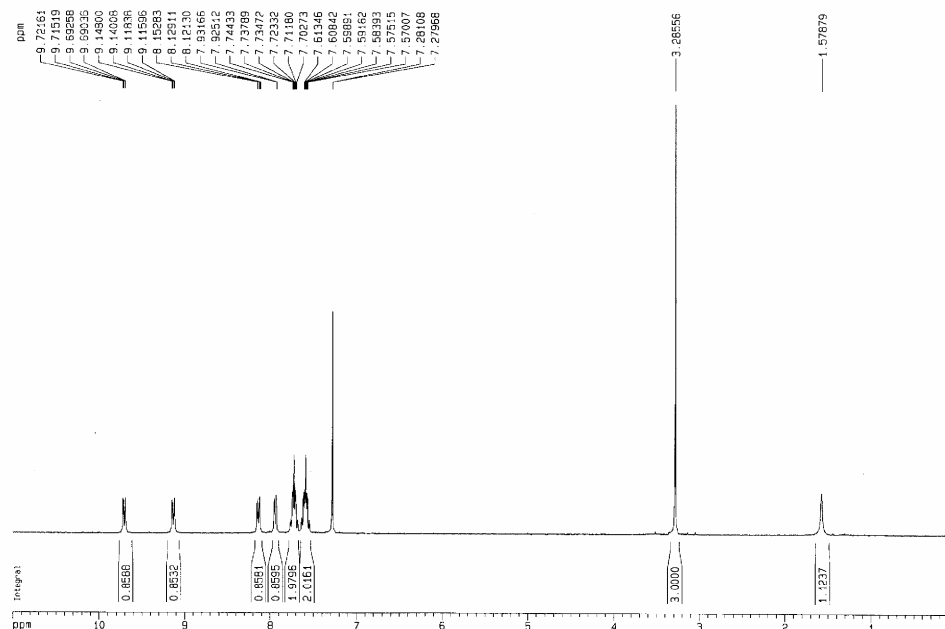

5c

arhy17 2004.12.28 (edc 21)

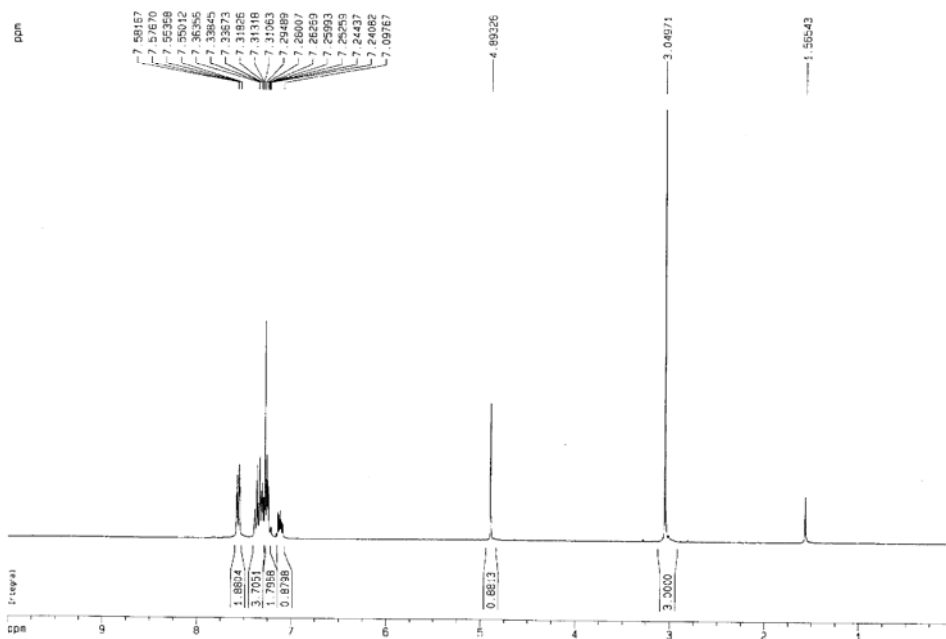

4d

arhy16 2004.12.28 (edc 20)

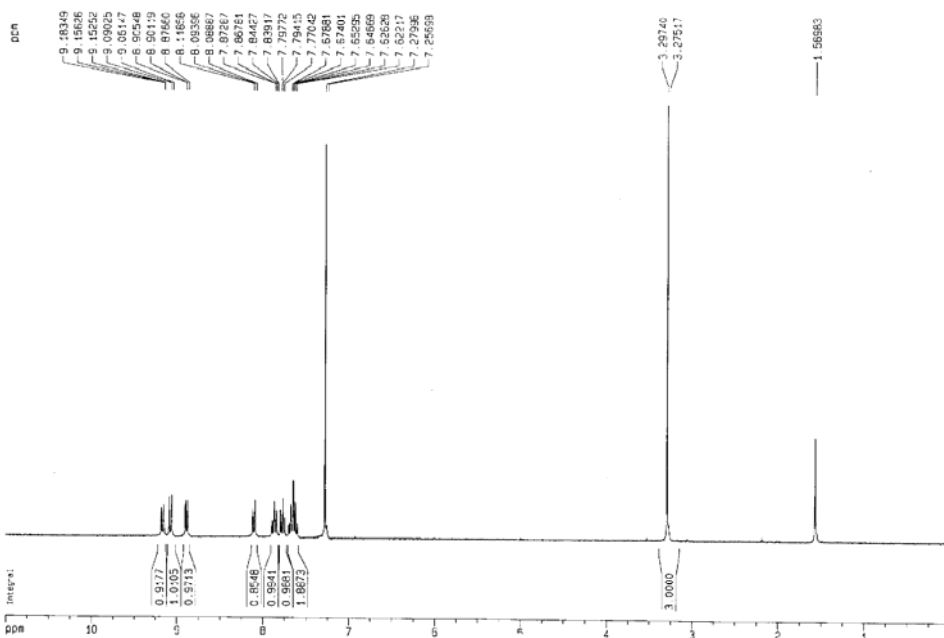

5d

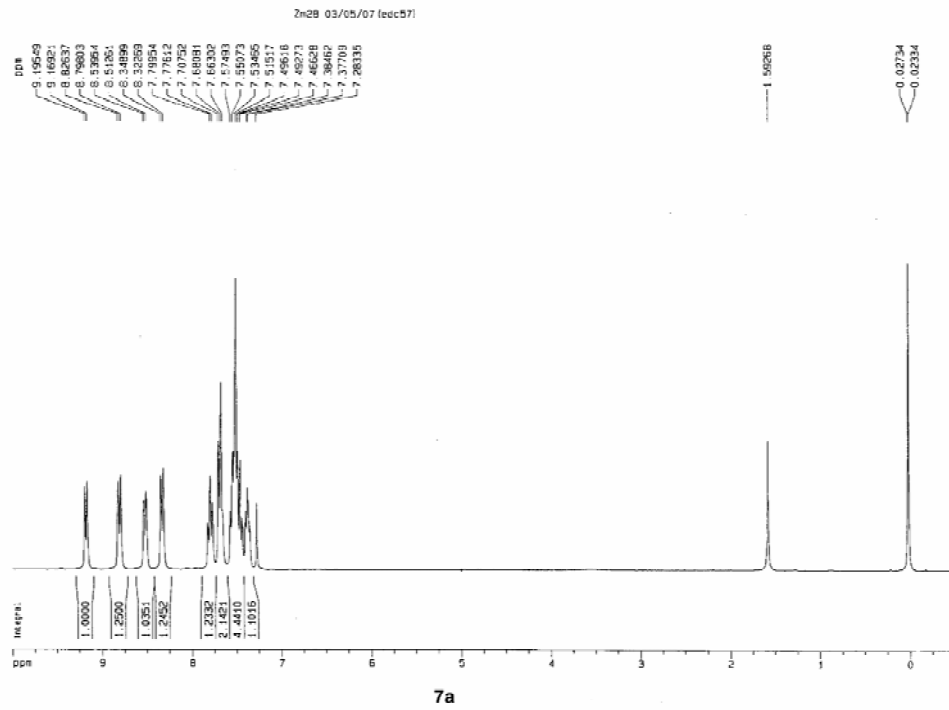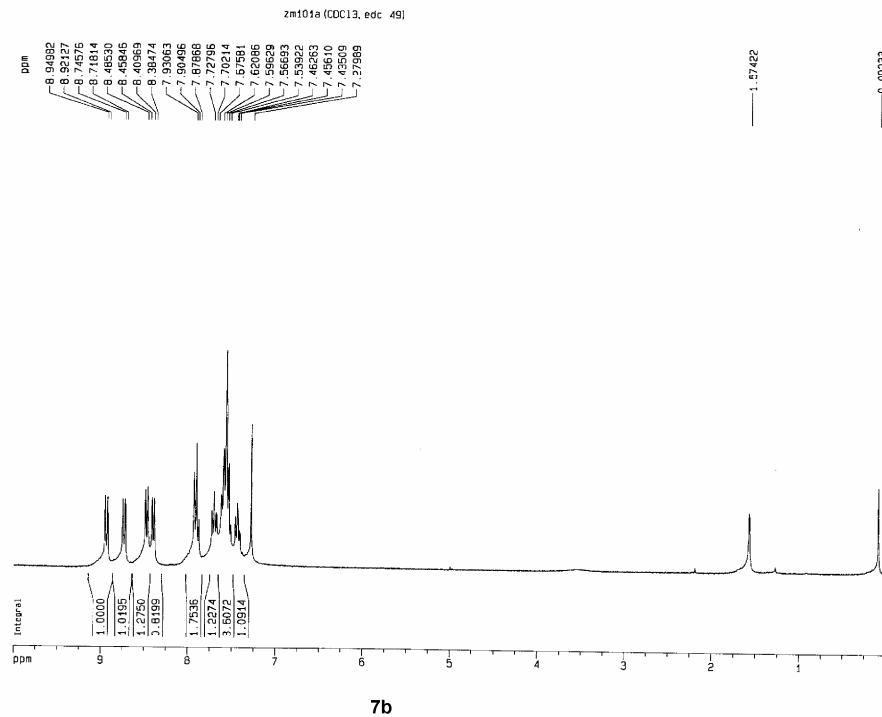

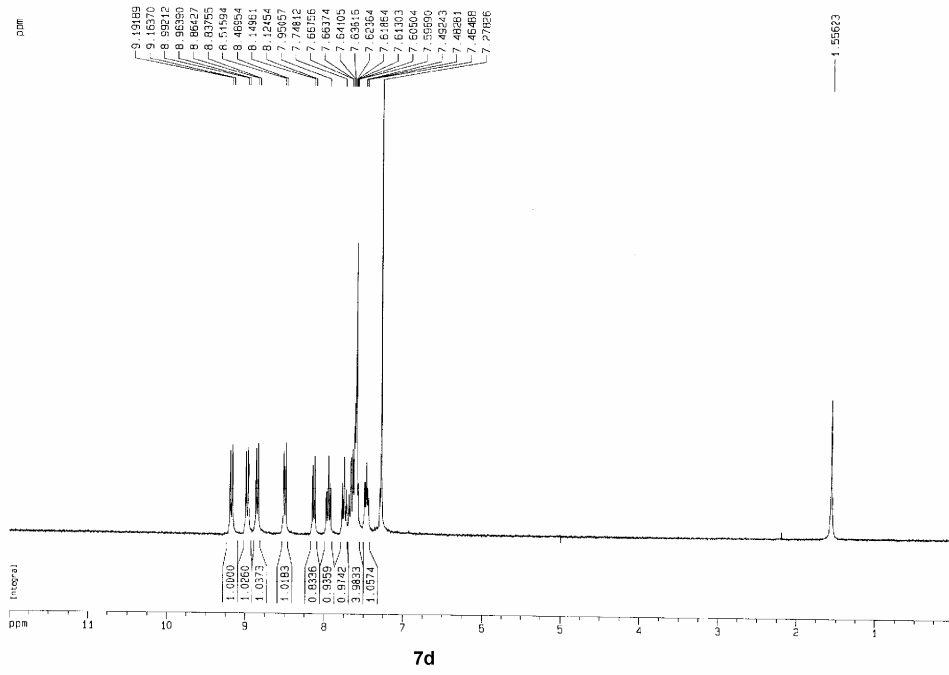



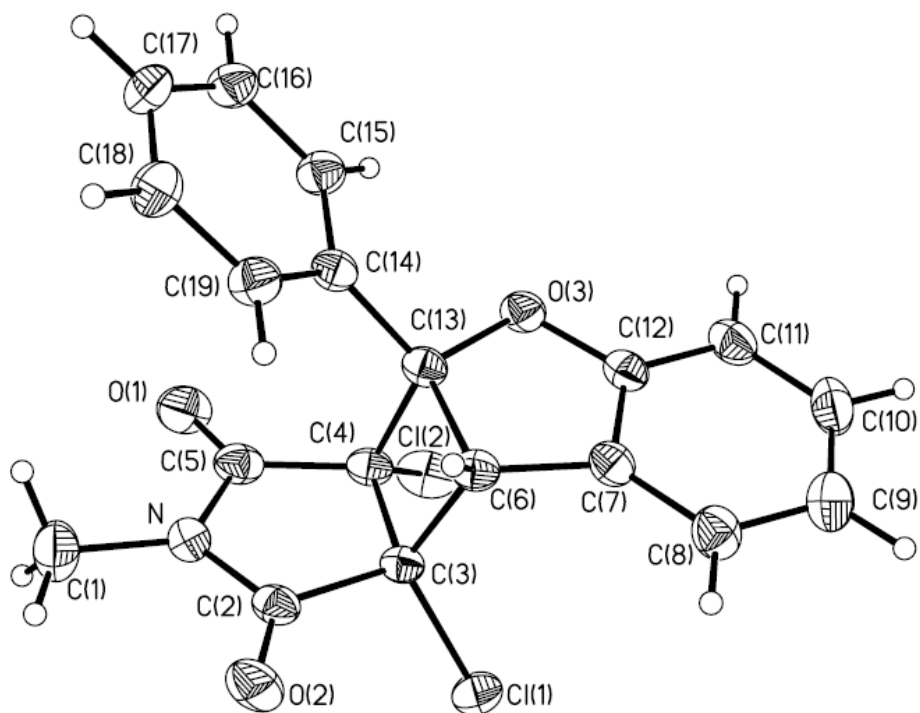

ORTEP drawing of **4a**

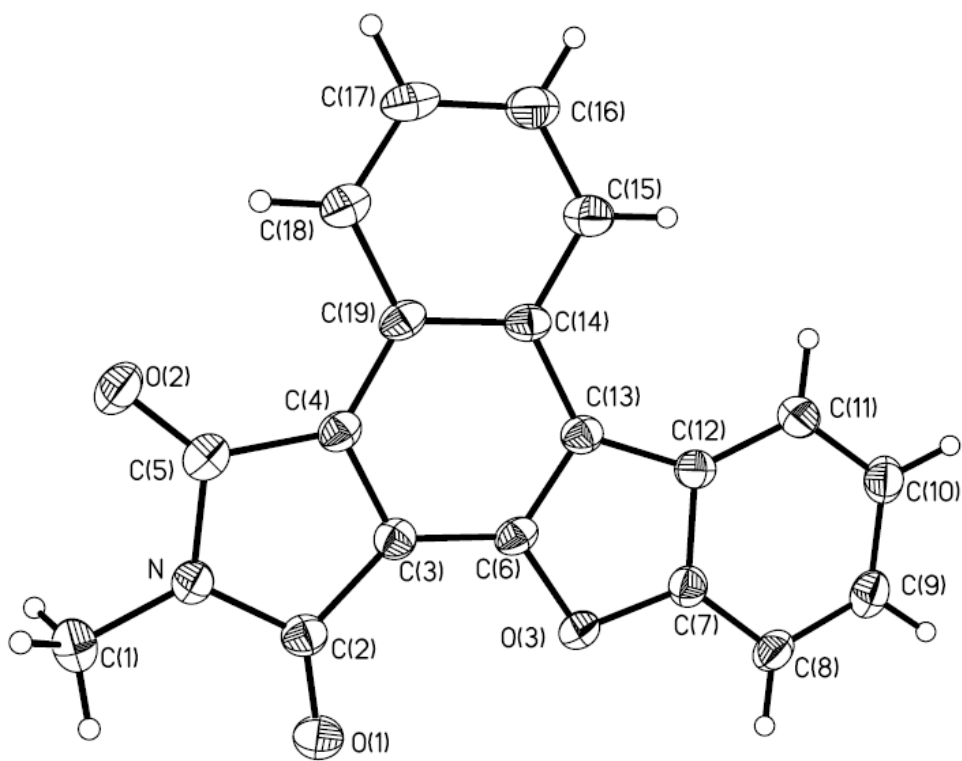

ORTEP drawing of **5b**
